# Supplementary material for: Implementation of Centering-Based Antenatal Group Care in Flanders (Belgium): Experiences of woman and health care providers. Modalities for sustainable integration into the health care system
Source: Research Square preprint supplement (doi:10.21203/rs.3.rs-7487538/v1), 2025-10-10
Supplement: Supplementary file 1 [file 33a8f9a5f31b94ed3b02b324.pdf]

## GC\_1000

“GROUP CARE FOR THE FIRST 1000 DAYS”

### Topic List Rapid Evaluation: Focus Groups with Facilitators

|                                     |                                                                             |
|-------------------------------------|-----------------------------------------------------------------------------|
| <i>Country Leader Belgium:</i>      | Prof. Dr. Katrien Beeckman                                                  |
| <i>Local research team Belgium:</i> | Astrid Van Damme<br>Florence Talrich                                        |
| <i>Project Dates:</i>               | Project Start Date: January 01, 2020<br>Project End Date: December 31. 2023 |
| <i>Grant Agreement Number</i>       | 848147 (Horizon 2020)                                                       |

## TOPIC GUIDE FOR FOCUS GROUP INTERVIEWS WITH FACILITATORS

### 1) How far do you feel the Group Care affects women's experiences of ANC/PNC?

- Prompt if needed only: **What do you think were the key features of this?** (a little more depth or clarification as needed according to initial response)
- PROMPT: Do you still provide traditional ANC/PNC? Do you feel the quality of care you offer is different in the two models?
- PROMPT: Did any women transfer back to 1-2-1 care? Why?

### 2) How do you feel about the composition of the groups – e.g. diversity in language, culture, gestation, education, obstetric/social risk.

- A): Including high-risk women:
  - When did this work well and when didn't it?
  - Did high-risk women stay in their Group Care despite having other appointments?
  - Did you think there were any particular benefits of it? (for individual high-risk women/for the group)
- B: Did you have anybody who spoke little (main local language)? How did you deal with that?
  - Facilities/involvement of health advocates or interpreters
  - Ensuring women are included
  - Managing time and interaction
- C: How did including/not including partners work in your sessions?
  - How often – e.g. some or all visits? How was this decided?
  - Ensuring partners are included
  - Managing time and interaction (including dynamics – partners being included but not dominating or speaking for women)

### 3) Thoughts and feelings about having facilitated Group ANC/PNC

- PROMPT: How did this experience impact on your knowledge and confidence levels?
- PROMPT: How did this experience impact on your sense of wellbeing/stress levels?

### 4) How did it feel to work in partnership with another facilitator to facilitate Group Care?

- PROMPT: Give examples to ways it was challenging or rewarding

### 5) Specific aspects of facilitation that they found most challenging

- PROMPT: How would you do things differently if you were to do it again?

### 6) Do you feel Group Care would work as part of normal ANC/PNC (as part of the national system)?

- PROMPT: What support is needed (for women and midwives/care providers) to integrate it?
- PROMPT: Do you think there are opportunities to extend Group Care into the antenatal/postnatal period (ask as appropriate to what stage they offered)?
