# Supplementary material for: Implementation of Centering-Based Antenatal Group Care in Flanders (Belgium): Experiences of woman and health care providers. Modalities for sustainable integration into the health care system
Source: Research Square preprint supplement (doi:10.21203/rs.3.rs-7487538/v1), 2025-10-10
Supplement: Supplementary file 2 [file 64678957052d80df228d15d5.pdf]

## GC\_1000

“GROUP CARE FOR THE FIRST 1000 DAYS”

### Observation Guide for Group Care

|                                     |                                                                             |
|-------------------------------------|-----------------------------------------------------------------------------|
| <i>Country Leader Belgium:</i>      | Prof. Dr. Katrien Beeckman                                                  |
| <i>Local research team Belgium:</i> | Astrid Van Damme<br>Florence Talrich                                        |
| <i>Project Dates:</i>               | Project Start Date: January 01, 2020<br>Project End Date: December 31. 2023 |
| <i>Grant Agreement Number</i>       | 848147 (Horizon 2020)                                                       |

## OBSERVATION GUIDE FOR GROUP CARE

**AIMS:**

1. To provide a 'thick description' of this aspect of the implementation of the group model of care
2. To develop understanding of how women and (where relevant) their partners/support persons respond to and participate in the group sessions
3. To develop understanding of staff confidence and preparedness to run groups and their development needs to adapt to a different way of working

**Key questions to frame the note taking:**

- Non-participant observation (but be prepared to join in if invited by the group).
- try as much as possible just to note down what you see and hear, not your views or opinions or reactions during the sessions, or your ideas about why you see or hear things – this comes later in the analysis
- The aim is to be semi-structured: open note taking, but with particular aims and questions in mind.
- No names/patient-identifiable data to be noted down.

**1) Record a basic but reasonably detailed description of how the group session is structured and delivered****2) How do participants appear to respond to the Group Care model?**

- How active are participants in contributing?
- Do they respond to facilitators' or other participants' or questions?
- Do they come up with their own questions, ideas, answers?
- How do the women cope with the self-testing? Do they appear to enjoy it?
- How do they respond to the length of the session?
- To what extent do partners/support persons get involved (if present)?
- Were there any language issues? How were they dealt with?
- Is everyone involved at some point in the discussion?
  - informal chit-chat amongst participants
  - facial expressions
  - body language
  - activity

**3) Any concerns?**

- Do they raise concerns they have? If so, what kind of concerns?
- Do they respond more positively to some activities rather than others?
- Do you notice any change in response from beginning to end of the session? (particularly for first session)

**4) Reflections at the end or soon afterwards:**

- Your own reactions as an observer

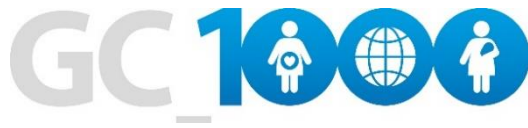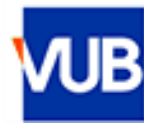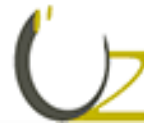

Universitair  
Ziekenhuis  
Brussel

- What is most noticeable to you?
- Anything surprise you?
- Did you observe what you expected?
