# Supplementary material for: Implementation of Centering-Based Antenatal Group Care in Flanders (Belgium): Experiences of woman and health care providers. Modalities for sustainable integration into the health care system
Source: Research Square preprint supplement (doi:10.21203/rs.3.rs-7487538/v1), 2025-10-10
Supplement: Supplementary file 3 [file 8923ba88fb06556ce906dc20.pdf]

## GC\_1000

“GROUP CARE FOR THE FIRST 1000 DAYS”

### Topic List Evaluation: Interviews with stakeholders

|                                     |                                                                             |
|-------------------------------------|-----------------------------------------------------------------------------|
| <i>Country Leader Belgium:</i>      | Prof. Dr. Katrien Beeckman                                                  |
| <i>Local research team Belgium:</i> | Astrid Van Damme<br>Florence Talrich                                        |
| <i>Project Dates:</i>               | Project Start Date: January 01, 2020<br>Project End Date: December 31. 2023 |
| <i>Grant Agreement Number</i>       | 848147 (Horizon 2020)                                                       |

## TOPIC GUIDE FOR INTERVIEWS WITH STAKEHOLDERS (LINE MANAGERS, POLICY MAKERS...)

*Explain purpose of interview – so that others in different settings can learn from their experience – important therefore to give their frank views, even if critical*

**1) What attracted you to engage with the GC implementation idea?**

**2) What kind of preparation do you feel you need? (if done later – looking back, what kind of preparation would you have wished to have)**

**3) What do you think will be a facilitator in the process of implementation?**

- Examples: Context, HCP, service users, setting, model of care

**4) What do you think will be a barrier/challenge in the process of implementation?**

- Examples

PROMPT: How can we help to minimize this barrier?

PROMPT: What action could be taken to minimize this barrier?

**5) How far do you feel the Group Care affects women's experiences of ANC/PNC?**

- Key features of this
- Comparing standard with GC

**6) How far do you feel the Group Care affects HCP experiences of providing ANC/PNC?**

- Key features of this
- Comparing standard with GC

**7) Do you feel Group Care would work as part of normal ANC/PNC (as part of the national system)?**

- PROMPT: What support is needed (for women and midwives/care providers/stakeholders) to integrate it?
- PROMPT: Do you think there are opportunities to extend Group Care into the antenatal/postnatal period (ask as appropriate to what stage they offered)?
- Do you think there are any services or groups for whom it is not suitable?

**8) Do you have any other thoughts and advice for the team who will develop the implementation toolkit?**
