# Supplementary material for: Implementation of Centering-Based Antenatal Group Care in Flanders (Belgium): Experiences of woman and health care providers. Modalities for sustainable integration into the health care system
Source: Research Square preprint supplement (doi:10.21203/rs.3.rs-7487538/v1), 2025-10-10
Supplement: Supplementary file 4 [file cc75787e56213aad40427651.pdf]

## GC\_1000

“GROUP CARE FOR THE FIRST 1000 DAYS”

### Topic List Evaluation: Focus Groups with Women

*Country Leader Belgium:* Prof. Dr. Katrien Beeckman

*Local research team Belgium:* Astrid Van Damme

Florence Talrich

*Project Dates:* Project Start Date: January 01, 2020

Project End Date: December 31. 2023

*Grant Agreement Number* 848147 (Horizon 2020)

## TOPIC GUIDE FOR FOCUS GROUP INTERVIEWS WITH WOMEN

**For all women who attend any Group Care:**

1) What was it like having pregnancy/postnatal care in a Group?

PROMPT:

- satisfaction with group model of care
- how it was conducted,
- contents,
- convenience,
- recommendation to another person

2) What were the best things about the Group Care?

3) What could we change or improve?

4) Would you like to **stay in touch** with each other from the Group?

- How could this be possible?
- Could the facilitators help this to happen?

5) Do you think the Group Care you received had an effect on your baby's and/or your use of health services for your baby in the first few months after the birth?

PROMPT: If yes prompt for type of effects and reasons

**Role of partners (if were present):**

6) How it was having your partner with you during Group Care?

PROMPT:

- the best sides of it;
- difficulties with it.

**For women who attend Group ANC:**

7) Do you think the Group ANC you received had an effect on your labour and birth?

PROMPT: If yes prompt for type of effects and reasons e.g. feeling more in control

**For women who attend ONLY Group ANC:**

8) Did you **meet with the other from the Group** postnatally anyway?

PROMPT: If yes prompt for reasons and incentives

**For women who attend Group PNC:**

9) Do you think the Group PNC you received had an effect on your care/**relationship**/bonding with the **baby**? And with your **family**?

PROMPT: If yes prompt for type of effects and reasons e.g. feeling more in control

**For women who attend both Group ANC and PNC:**

10) **How was it to meet in the group** again after your baby were born?

PROMPT:

- the best sides of it;
- difficulties with it.
